# Supplementary material for: A new approach for sustained and efficient H2 photoproduction by Chlamydomonas reinhardtii
Source: Royal Society of Chemistry journal article supplement (doi:10.1039/c8ee00054a), 2018-01-01
Supplement: c8ee00054a1.pdf [file c8ee00054a1.pdf]

## A new approach for sustained and efficient H<sub>2</sub> photoproduction by *Chlamydomonas reinhardtii*

Sergey Kosourov\*, Martina Jokel, Eva-Mari Aro and Yagut Allahverdiyeva\*

## Electronic supplementary information (ESI)

---

*Molecular Plant Biology, Department of Biochemistry,  
University of Turku, Turku, FI-20014, Finland.*

*\*Corresponding authors:*

*Dr. Sergey Kosourov, e-mail: [serkos@utu.fi](mailto:serkos@utu.fi), tel:  
+358451577800;*

*Dr. Yagut Allahverdiyeva, e-mail: [allahve@utu.fi](mailto:allahve@utu.fi), tel:  
+358503506181.*

**Figure S1.** Photochemical activity in the wild-type *Chlamydomonas reinhardtii* culture exposed to a train of 1 s light pulses interrupted by 9 s dark periods. Before measurements, cell suspensions at around  $14 \mu\text{g mL}^{-1}$  Chl (*a + b*) were dark adapted for 10 min in the gas tight cuvette under either Ar or air atmosphere. A train of saturating white light pulses ( $\sim 500 \mu\text{mol photons m}^{-2} \text{s}^{-1}$ ) was provided with the pulse amplitude modulated fluorometer (Dual-PAM-100, Walz). Arrows indicate the points for switching on / off the measuring light. Algal suspension was stirred throughout the experiment. In the case of anaerobic incubation, the presence of  $\text{H}_2$  gas in the headspace of the cuvette was confirmed with a GC.

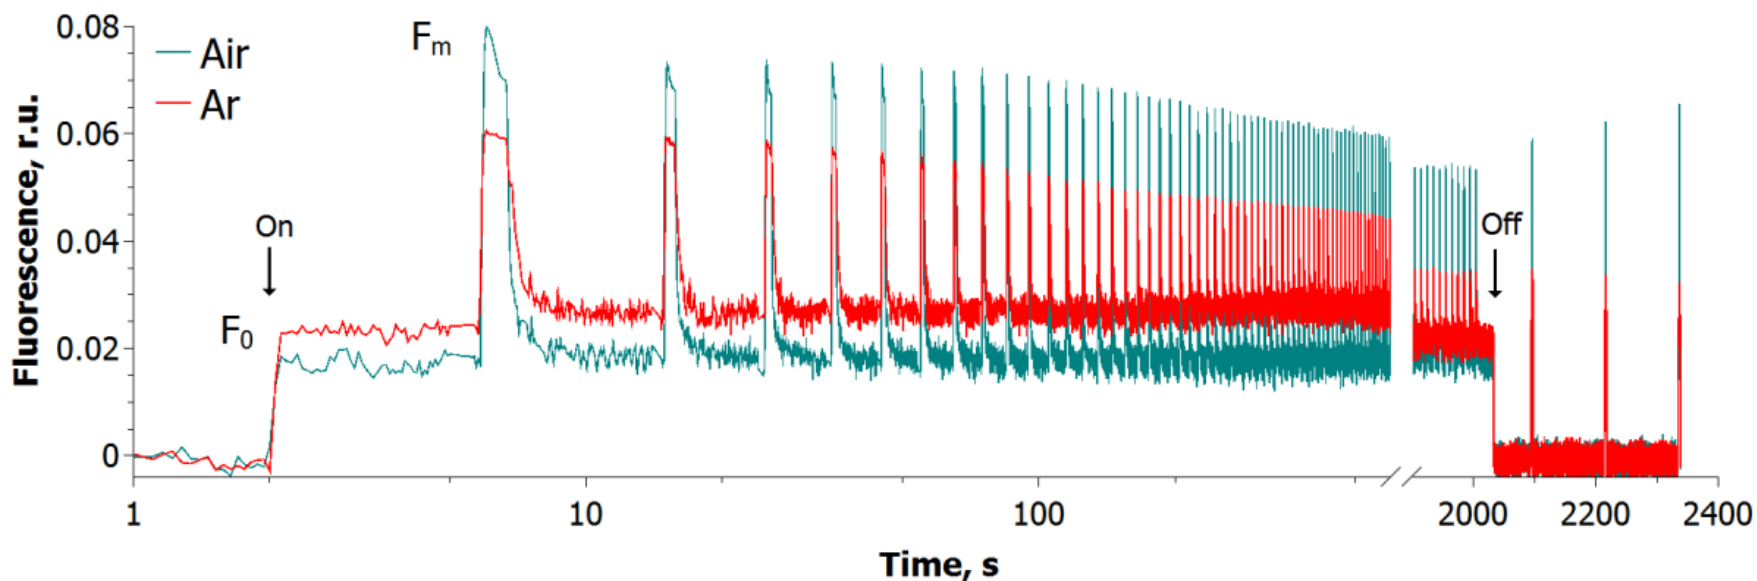

**Figure S2.** H<sub>2</sub> photoproduction and O<sub>2</sub> evolution in algal cultures exposed to continuous light. The cultures were treated with different amounts of 1 s light pulses (420 μmol photons m<sup>-2</sup> s<sup>-1</sup>) interrupted by 9 s dark periods (shown as a number of cycles), dark-adapted for 2 minutes, and then continuous light of the same intensity was applied. The arrows indicate the points of continuous light application.

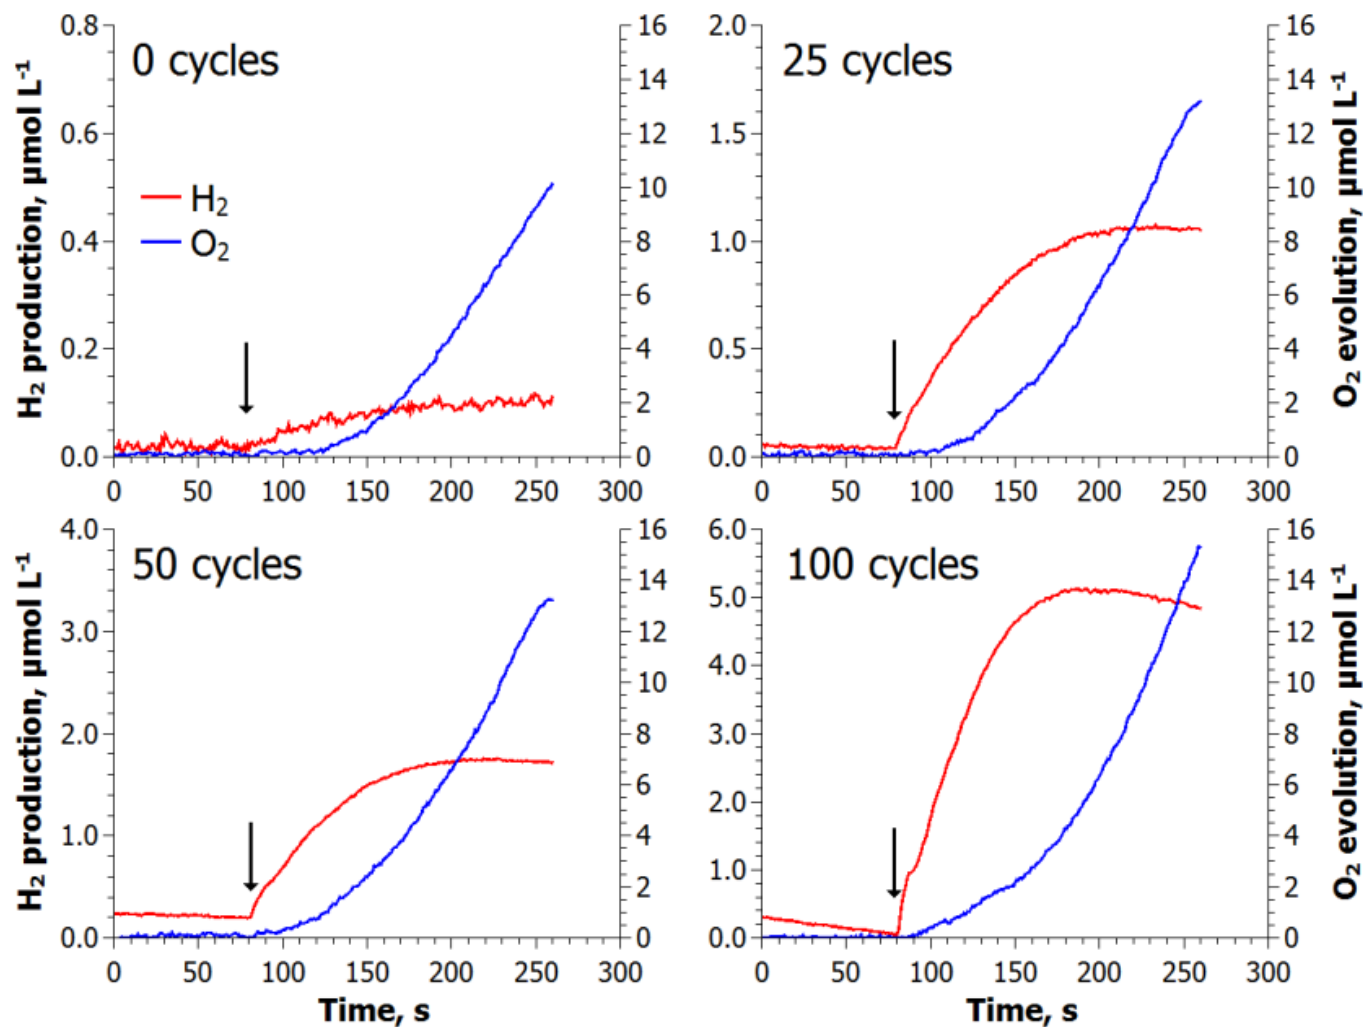

**Figure S3.** Mass spectrometric simultaneous monitoring of H<sub>2</sub>, O<sub>2</sub> and CO<sub>2</sub> exchange in algal cultures exposed to a train of 1 s light pulses (420 μmol photons m<sup>-2</sup> s<sup>-1</sup>) interrupted by 3 s dark periods.

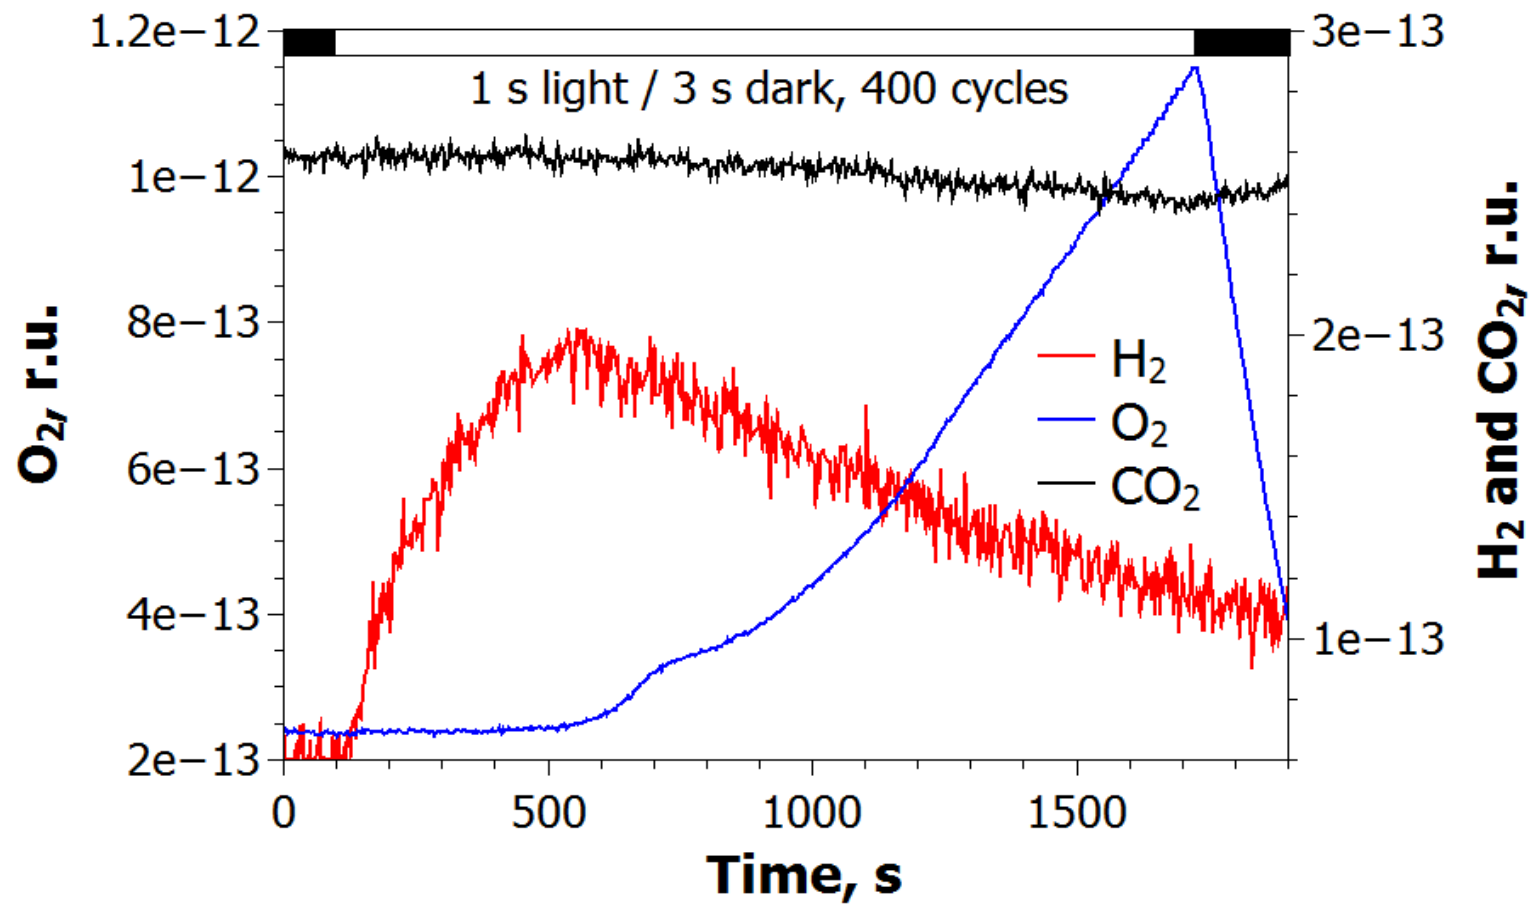

**Figure S4.** Evaluation of light energy to H<sub>2</sub> energy conversion efficiency (LHCE) of the pulse-illuminated *C. reinhardtii* cultures. 10 ml algal suspensions with the total Chl content of about 18 mg L<sup>-1</sup> were exposed to a train of 1 s light pulses (35.11 W m<sup>-2</sup> PAR) interrupted by 9 s dark periods under Ar atmosphere. The LHCEs were calculated for the maximum rate of H<sub>2</sub> photoproduction (red line) and for the 54 h production period using eqn (1). 35.11 W m<sup>-2</sup> corresponds to 180 μmol photons m<sup>-2</sup> s<sup>-1</sup> white light at the surface of the suspension culture.

$$\eta (\%) = 100 \frac{\left( \Delta G^{\circ} - RT \ln \left( \frac{P^{\circ}}{P} \right) \right) V_H}{E_S t A} \quad (1)$$

where  $\Delta G^{\circ}$  is the change of the standard Gibb's free energy for the water-splitting reaction (237,200 J mol<sup>-1</sup> at 25°C and 1 atm),  $R$  is the universal gas constant,  $T$  is the absolute temperature,  $P^{\circ}$  and  $P$  are the standard and observed H<sub>2</sub> pressures (atm),  $V_H$  is the amount of H<sub>2</sub> photoproduced (mol),  $E_S$  is the energy of the incident light radiation (J m<sup>-2</sup> s<sup>-1</sup>),  $A$  is the illuminated surface area (m<sup>2</sup>) and  $t$  is a sum of illumination periods (s).

### (A) Original H<sub>2</sub> photoproduction data

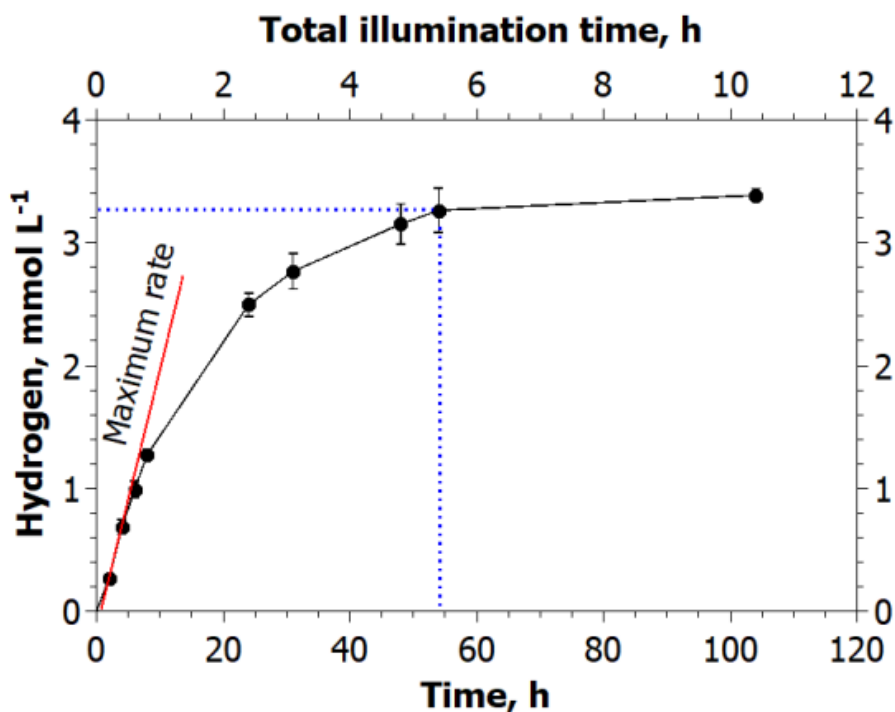

### (B) Parameters and final efficiencies

|                                             | Max. rate  | H <sub>2</sub> yield (54 h) |
|---------------------------------------------|------------|-----------------------------|
| $V_H$ (mol):                                | 4.20134E-6 | 3.26347E-5                  |
| $P$ (atm):                                  | 0.0028     | 0.0133                      |
| $A$ (m <sup>2</sup> ):                      | 0.002178   | 0.002178                    |
| $E_S$ (J m <sup>-2</sup> s <sup>-1</sup> ): | 35.11      | 35.11                       |
| $t$ (s):                                    | 720        | 19440                       |
| $\eta$ (%):                                 | 1.7        | 0.5                         |
| $\eta_{\text{upper}}$ (%):                  | 2.2        | 0.63                        |

\*  $\eta_{\text{upper}}$  calculated for the upper H<sub>2</sub> gas combustion energy ( $\Delta H_c$ ) of 285.8 kJ mol<sup>-1</sup>.
